# Supplementary material for: Analysis of microbial diversity and functions in sediments and overlying water of the Shiliu River
Source: PeerJ. 2025 Aug 29;13:e19979. doi: 10.7717/peerj.19979 (PMC12401026; doi:10.7717/peerj.19979)
Supplement: Supplemental Information 9 [file peerj-13-19979-s009.xls]

## Sheet: Sheet1
	B1	B2	B3	D1	D2	D3
unknown	93.4094355815239	91.3822356052153	93.8255479554074	78.0058651026393	90.6931017532361	96.552377344194
Animal Endosymbiont-Animal Pathogen-Plant Pathogen-Undefined Saprotroph	2.26778429597583	1.86784464179264	1.69800295603753	5.89442815249267	3.07021137145666	0.224158615899476
Undefined Saprotroph	0.718308037761136	1.08983079345184	1.17554050802599	3.84164	2.61346878584303	0.62196123003094
Endophyte-Plant Pathogen	0.423225685096578	0.36072940708925	0.33570503786707	2.92766373411535	0.45059806652466	0
Animal Pathogen	0.364444339944275	0.635862005716644	0.355182804569255	1.43695014662757	0.399393740783221	1.06396413462146
Bryophyte Parasite-Dung Saprotroph-Ectomycorrhizal-Fungal Parasite-Leaf Saprotroph-Plant Parasite-Undefined Saprotroph-Wood Saprotroph	0.27979920292496	0.486067590908396	0.164988141477331	2.0039100684262	0.286744224152056	0.413588432152554
Insect Parasite-Undefined Saprotroph	0.536085867788998	0.466196903229751	0.417053357623254	1.46627565982405	0.702523349172538	0
Animal Pathogen-Endophyte-Plant Pathogen-Wood Saprotroph	0.0799426294071314	0.0825397795882182	0.0870770746685915	1.56402737047898	0.106504997542192	0.258887415545874
Other	1.92097435957724	3.62869327300796	1.94090216432361	2.85923753665689	1.67745371128953	0.865062827555724
